# 1 **Polymerization of C9 enhances bacterial cell envelope damage and killing by membrane** 2 **attack complex pores**

3 Dennis J. Doorduyn<sup>1</sup>, Dani A.C. Heesterbeek<sup>1</sup>, Maartje Ruyken<sup>1</sup>, Carla J.C. de Haas<sup>1</sup>, Daphne  
4 A.C. Stapels<sup>1</sup>, Piet C. Aerts<sup>1</sup>, Suzan H. M. Rooijackers<sup>1</sup> and Bart W. Bardoel<sup>1\*</sup>

5 <sup>1</sup> *Department of Medical Microbiology, University Medical Center Utrecht, Utrecht, The*  
6 *Netherlands*

7 \* Corresponding author, e-mail: [b.w.bardoel-2@umcutrecht.nl](mailto:b.w.bardoel-2@umcutrecht.nl)

## 8 Abstract

9 Complement proteins can form Membrane Attack Complex (MAC) pores that directly kill  
10 Gram-negative bacteria. MAC pores assemble by stepwise binding of C5b, C6, C7, C8 and  
11 finally C9, which can polymerize into a transmembrane ring of up to 18 C9 monomers. It is  
12 still unclear if the assembly of a polymeric-C9 ring is necessary to sufficiently damage the  
13 bacterial cell envelope to kill bacteria, because a robust way to specifically prevent  
14 polymerization of C9 has been lacking. In this paper, polymerization of C9 was prevented  
15 without affecting the binding of C9 to C5b-8 by locking the first transmembrane helix domain  
16 of C9. We show that polymerization of C9 strongly enhanced bacterial cell envelope damage  
17 and killing by MAC pores for several *Escherichia coli* and *Klebsiella* strains. Moreover, we  
18 show that polymerization of C9 is impaired on complement-resistant *E. coli* strains that survive  
19 killing by MAC pores. Altogether, these insights are important to understand how MAC pores  
20 kill bacteria and how bacterial pathogens can resist MAC-dependent killing.

21

## 22 Introduction

23 Complement proteins in human serum play a crucial role in fighting off invading bacteria.  
24 Activation of the complement cascade ultimately results in the assembly of membrane attack  
25 complex (MAC) pores that can directly kill Gram-negative bacteria [1–3]. MAC assembly is  
26 initiated when recognition molecules, such as antibodies and lectins, bind to bacteria and recruit  
27 early complement proteins [4]. This triggers a proteolytic cascade that deposits convertase  
28 enzymes on the bacterial surface [5]. These convertases convert complement component C5  
29 into C5b, which initiates the assembly of a large ring-shaped MAC pore that damages the  
30 bacterial cell envelope [3,6,7]. Although MAC pores can efficiently kill complement-sensitive  
31 bacteria, some bacterial pathogens can survive killing by MAC pores [8–11]. Therefore,

32 studying how MAC pores kill bacteria is important to understand how the complement system  
33 prevents infections and how bacterial pathogens resist killing by MAC pores.

34 MAC pores assemble in a stepwise manner [12]. When a surface-bound convertase converts  
35 C5 into C5b, C5b immediately binds to C6 to form the C5b6 complex [13,14]. Direct binding  
36 of C7 to C5b6 stably anchors the MAC precursor to the membrane [15]. Next, C8 binds to  
37 membrane-anchored C5b-7, which triggers structural rearrangements in C8 that result in  
38 insertion of a transmembrane  $\beta$ -hairpin into the membrane [16,17]. Finally, C9 binds to C5b-8  
39 and polymerizes to form a transmembrane ring of up to 18 monomers C9 with an inner diameter  
40 of 11 nm [18,19].

41 Although C5b-8 can already cause small 1-2 nm lesions in the membrane of erythrocytes and  
42 liposomes without a polymeric-C9 ring [17,20], it is still unclear if C9 polymerization is  
43 required to sufficiently damage the complex bacterial cell envelope to kill Gram-negative  
44 bacteria. On bacteria, MAC pores initially assemble on the outer membrane (OM), which  
45 largely consists of lipopolysaccharide (LPS). The O-antigen (O-Ag) of LPS can vary in length  
46 between bacterial strains and species [21,22], and this has frequently been associated with  
47 complement-resistance [8,9,23,24]. Apart from the OM, the Gram-negative cell envelope also  
48 consists of a cytosolic inner membrane (IM) and a periplasmic peptidoglycan layer [25]. We  
49 recently developed methods to separately study OM and IM damage in time [14,26]. Here, we  
50 wanted to use these methods to study how C9 polymerization contributes to bacterial cell  
51 envelope damage by MAC pores. Moreover, a direct causal link between polymerization of C9  
52 and bacterial killing has still not been established, mainly because there was no robust system  
53 in which polymerization of C9 could specifically be prevented. Recently, Spicer *et al.* suggested  
54 that ‘locking’ the first transmembrane helix (TMH-1) domain of C9 could prevent  
55 polymerization of C9, without affecting the binding of C9 to C5b-8 [27]. Here, we wanted to  
56 use this ‘locked’ C9 to study if C9 polymerization contributes to bacterial cell envelope damage  
57 and killing by MAC pores.

58 In this paper, we show that polymerization of C9 enhanced the efficiency by which MAC pores  
59 damage both the OM and IM, which ultimately resulted in faster killing of several *Escherichia*  
60 *coli* and *Klebsiella* strains. This study therefore highlights that MAC pores have to completely  
61 assemble to efficiently damage the bacterial cell envelope and kill bacteria. Moreover, we found  
62 that polymerization of C9, but not binding of C9 to C5b-8, was impaired on several  
63 complement-resistant *E. coli* strains that survive killing by MAC pores. This study therefore  
64 also provides insights into how bacterial pathogens resist MAC-dependent killing.

## 65 Results

### 66 **Locking the TMH-1 of C9 strongly impairs its capacity to polymerize, without preventing** 67 **binding to C5b-8 on *E. coli***

68 To study the contribution of C9 polymerization to bacterial killing by the MAC, we wanted to  
69 use a system in which C9 can bind to C5b-8, but cannot polymerize. Spicer *et al.* recently  
70 suggested that the TMH-1 domain of C9 has a crucial role in C9 polymerization [27]. When C9  
71 binds to C5b-8, structural rearrangements in C9 trigger unfurling of the TMH-1 (**Fig. 1a-I**) and  
72 TMH-2 (not shown in illustration) to form a transmembrane  $\beta$ -hairpin. Although both TMH  
73 domains of C9 insert into the membrane, unfurling of the TMH-1 domain also exposes an  
74 elongation surface that allows a subsequent C9 to bind (**Fig. 1a-II**). This ultimately results in  
75 the assembly of a polymeric-C9 ring (**Fig. 1a-III**). Based on this crucial role of the TMH-1  
76 domain in polymerization, Spicer *et al.* designed a C9 TMH-1 ‘lock’ mutant (C9<sub>TMH-1 lock</sub>) in  
77 which the TMH-1 domain was linked to  $\beta$ -strand 4 of the MACPF/CDC domain via an  
78 intramolecular cysteine bridge. This lock prevents unfurling of the TMH-1 domain once C9  
79 binds to C5b-8, and thus prevents both the formation of a transmembrane  $\beta$ -hairpin (**Fig. 1a-**  
80 **IV**) and binding of a subsequent C9 (**Fig. 1a-V**). Reducing the cysteine bridge with DTT can  
81 unlock the TMH-1 domain and restore its capacity to polymerize (**Fig. 1a-VI**).

82 C9<sub>TMH-1 lock</sub> was recombinantly expressed and site-specifically labelled with a fluorophore via  
83 sortagging, as was done previously for wildtype C9 (C9<sub>wt</sub>) [14]. Fluorescent labelling was  
84 comparable between both C9<sub>TMH-1 lock</sub> and C9<sub>wt</sub> (**S1a**), which means that the fluorescence of  
85 both proteins can be directly compared in our assays. C9<sub>TMH-1 lock</sub> showed impaired lysis of  
86 sheep erythrocytes compared to C9<sub>wt</sub>, which could be restored by reducing C9<sub>TMH-1 lock</sub> with  
87 DTT (**S1b**). Moreover, fluorescent C9<sub>TMH-1 lock</sub> was used to distinguish SDS-stable polymeric-  
88 C9 (poly-C9) from monomeric-C9 (mono-C9) by SDS-PAGE, which is frequently used as a  
89 read-out for C9 polymerization [28]. C9<sub>TMH-1 lock</sub> did not form poly-C9 together with  
90 preassembled C5b6 (pC5b6), C7 and C8, whereas C9<sub>wt</sub> did (**S1c**). These data confirm that the  
91 capacity of C9<sub>TMH-1 lock</sub> to form polymers is impaired, and can be reversed by reducing the  
92 cysteine bridge lock.

93 Next, we wanted to validate that locking the TMH-1 domain only prevents polymerization of  
94 C9, without preventing binding of C9 to C5b-8. *E. coli* MG1655 bacteria were incubated in C8-  
95 depleted serum to activate complement and label them with MAC precursor C5b-7 (**Fig. 1b**).  
96 C5b-7 labelled bacteria were washed to remove remaining serum components and incubated

97 with C8 and C9<sub>wt</sub> or C9<sub>TMH-1 lock</sub> to further assemble the MAC. Both C9<sub>wt</sub> and C9<sub>TMH-1 lock</sub> bound  
98 to C5b-7 in a C8-dependent manner as measured by flow cytometry (**Fig. 1c**), although C9<sub>wt</sub>  
99 binding was 10-fold higher than C9<sub>TMH-1 lock</sub>. Since the amount of C5b-8 on the surface, as  
100 measured by C6-FITC binding, was comparable for both C9<sub>wt</sub> and C9<sub>TMH-1 lock</sub> (**S1d**), the  
101 relative difference in C9 binding suggested a difference in polymerization of C9 (**Fig. 1d**). SDS-  
102 PAGE confirmed that only mono-C9 was detected on bacteria incubated with C9<sub>TMH-1 lock</sub> (**Fig.**  
103 **1e**). Moreover, reducing C9<sub>TMH-1 lock</sub> with DTT increased binding 3-fold compared to C9<sub>TMH-1</sub>  
104 lock without DTT (**Fig. 1c,d**) and resulted in the detection of poly-C9 on bacteria by SDS-PAGE  
105 (**Fig. 1e**). This suggests that reducing C9<sub>TMH-1 lock</sub> only partially restored its capacity to  
106 polymerize compared to C9<sub>wt</sub> (**Fig. 1c,d**). Finally, an antibody that recognizes a neo-epitope  
107 exposed in poly-C9, which is frequently used for the detection of MAC pores [29], specifically  
108 detected bacteria incubated with C9<sub>wt</sub>, but not with C9<sub>TMH-1 lock</sub> (**Fig. 1f**). Altogether, these data  
109 indicate that the C9<sub>TMH-1 lock</sub> can bind to C5b-8 on *E. coli*, but that its capacity to polymerize is  
110 strongly impaired.

### 111 **Polymerization of C9 enhances bacterial killing by MAC pores**

112 We then assessed if polymerization of C9 is important for bacterial killing by the MAC. A DNA  
113 dye that cannot permeate an intact IM (Sytox) was used to measure the percentage of cells with  
114 IM damage by flow cytometry, which we have previously shown to be a sensitive read-out for  
115 bacterial killing [14]. Adding C9<sub>wt</sub> to C5b-8 labelled bacteria resulted in IM damage in a dose-  
116 dependent manner, reaching 100% Sytox positive cells from above 3 nM C9 (**Fig. 2a**). For  
117 C9<sub>TMH-1 lock</sub>, IM damage was impaired and did not increase above 30% Sytox positive cells at  
118 100 nM C9 (**Fig. 2a**). Moreover, bacterial viability was determined by counting colony forming  
119 units (CFU's) and decreased only 10-fold for C9<sub>TMH-1 lock</sub> compared to C5b-8 alone, whereas  
120 C9<sub>wt</sub> decreased bacterial viability at least a 1,000-fold (**Fig. 2c**). Reducing C9<sub>TMH-1 lock</sub> with DTT  
121 restored its capacity to damage the IM (**Fig. 2b**) and kill bacteria (**Fig. 2c**). Finally,  
122 polymerization of C9<sub>wt</sub> (**Fig. 2d**) and subsequent IM damage (**Fig. 2e**) could be inhibited by  
123 C9<sub>TMH-1 lock</sub> in a dose-dependent manner. Poly-C9 detection already decreased by 50% when  
124 the amount of C9<sub>TMH-1 lock</sub> was still 10-fold lower than the amount of C9<sub>wt</sub> (**Fig. 2d**), which  
125 suggested that C9<sub>TMH-1 lock</sub> can interfere at multiple stages in the assembly of a polymeric-C9  
126 ring. However, IM damage was only fully inhibited when there was 10-fold more C9<sub>TMH-1 lock</sub>  
127 than C9<sub>wt</sub> (**Fig. 2e**), suggesting that only very few C9 polymers are required to damage the IM.  
128 Altogether, our data suggest that polymerization of C9 enhances bacterial killing by MAC  
129 pores.

### 130 **Polymerization of C9 increases OM damage**

131 Since MAC pores initially assemble on the OM [14], we also wondered how C9 polymerization  
132 contributes to OM damage. First, OM damage was compared for C9<sub>wt</sub> and C9<sub>TMH-1 lock</sub> by  
133 measuring leakage of periplasmic mCherry (*perimCherry*, 22 kDa) through the OM of MG1655  
134 using flow cytometry [14]. Adding C9<sub>wt</sub> to C5b-8 labelled bacteria resulted in rapid leakage of  
135 *perimCherry* within 5 minutes (**Fig. 3a**). By contrast, no more *perimCherry* leaked out with C9<sub>TMH-</sub>  
136 <sub>1 lock</sub> compared to C5b-8 alone within 60 minutes, suggesting that polymerization of C9 is  
137 required to cause leakage of periplasmic proteins through the OM.

138 We also assessed if C9 polymerization affects the influx of extracellular molecules through the  
139 OM. We have previously shown that perturbation of the OM by MAC pores can sensitize Gram-  
140 negative bacteria to the antibiotic nisin (3.4 kDa), which normally cannot pass through the OM  
141 of Gram-negative bacteria [26]. A 1,000-fold more C5b-8 was required to sensitize bacteria to  
142 nisin with C9<sub>TMH-1 lock</sub> compared to C9<sub>wt</sub> (**Fig. 3b**), suggesting that polymerization of C9  
143 strongly enhanced damage to the OM. Finally, we measured the influx of DiOC<sub>2</sub> (0.5 kDa)  
144 through the OM in the presence or absence of polymerization. DiOC<sub>2</sub> is a green fluorescent dye  
145 that shifts to red fluorescence when it is incorporated in membranes with a membrane potential,  
146 which in the case of *E. coli* is the IM. With C9<sub>TMH-1 lock</sub>, the increase in red:green fluorescence  
147 ratio was delayed compared to C9<sub>wt</sub>, suggesting that polymerization of C9 enhanced the influx  
148 of DiOC<sub>2</sub> through the OM (**Fig. 3c**). When bacteria die the IM potential is lost, which results in  
149 a drop of red fluorescence. Loss of IM potential, initiated at the peak in red:green ratio, was  
150 also delayed with C9<sub>TMH-1 lock</sub> compared to C9<sub>wt</sub> (**Fig. 3c**). Interestingly, C9<sub>TMH-1 lock</sub> did cause  
151 more rapid influx of DiOC<sub>2</sub> (**Fig. 3c**) and nisin (**S2**) through the OM compared to C5b-8 alone.  
152 This also suggests that binding of C9 to C5b-8 in the absence of polymerization slightly  
153 increases OM damage. Altogether, these data highlight that polymerization of C9 increases  
154 damage to the OM.

### 155 **Polymerization of C9 is rate-limiting in the assembly of complete MAC pores**

156 A recent study suggested that binding of the first C9 to C5b-8 is a kinetic bottleneck in the  
157 formation of a complete MAC pore on model lipid membranes [30]. Here, we used C9<sub>TMH-1 lock</sub>  
158 to study if this is also the case when MAC pores assemble on bacteria. Therefore, *E. coli*  
159 MG1655 were labelled with a constant amount of C5b-8 while the amount of available C9<sub>wt</sub>  
160 and C9<sub>TMH-1 lock</sub> was limited. Binding of C9<sub>wt</sub> was comparable to C9<sub>TMH-1 lock</sub> when the amount  
161 of available C9 was below 1 nM (**Fig. 4a**), suggesting that there is no polymerization when the

162 amount of available C9 is limited. As the amount of available C9 was increased, binding of  
163 C9<sub>wt</sub> continued to increase up to 10-fold higher than C9<sub>TMH-1 lock</sub> (**Fig. 4a**), whereas binding of  
164 C9<sub>TMH-1 lock</sub> saturated (**Fig. 4a**). This suggests that C9 starts polymerizing when all C5b-8  
165 complexes have bound one C9 molecule. This was confirmed by antibody staining (**Fig. 4c**)  
166 and SDS-PAGE (**Fig. 4d**), showing mainly mono-C9 when C9 is limited and the appearance of  
167 poly-C9 at C9 concentrations above 1 nM. Moreover, when the amount of surface-bound C5b-  
168 8 was varied by titrating C8, the difference in C9<sub>wt</sub> binding compared to C9<sub>TMH-1 lock</sub> binding  
169 decreased when an excess of C8 was added (**S3a,b**). *perimCherry* leakage (**S3c**) and SDS-PAGE  
170 (**S3d**) confirmed that an excess of C8 decreased the relative abundance of poly-C9 compared  
171 to mono-C9. Altogether, these data suggest that polymerization of C9 is rate-limiting in the  
172 assembly of complete MAC pores on bacteria.

### 173 **Polymerization of C9 enhances bacterial cell envelope damage and killing in serum**

174 So far, we have looked at the effect of C9 polymerization on the MAC in the absence of other  
175 serum components. Next, we wanted to see if polymerization of C9 also enhances bacterial cell  
176 envelope damage and killing in a serum environment. MG1655 was incubated in 3% C9-  
177 depleted serum with C9<sub>wt</sub> or C9<sub>TMH-1 lock</sub> and influx of DiOC<sub>2</sub> or Sytox were measured over  
178 time in a plate-reader to measure OM and IM damage respectively. OM damage (**Fig. 5a**)  
179 preceded IM damage (**Fig. 5b**), but both were delayed by 30 minutes with C9<sub>TMH-1 lock</sub> compared  
180 to C9<sub>wt</sub>. Also, bacterial viability was a 1,000-fold higher for C9<sub>TMH-1 lock</sub> compared to C9<sub>wt</sub> after  
181 30 minutes (**Fig. 5c**). These data suggest that polymerization of C9 enhances bacterial cell  
182 envelope damage and killing in serum.

183 Interestingly, bacteria were killed with C9<sub>TMH-1 lock</sub> to a comparable level as C9<sub>wt</sub> after 90  
184 minutes. This was not observed with C9<sub>TMH-1 lock</sub> in the absence of serum (**S4a**), which indicated  
185 that the presence of serum affects killing by the MAC, even in the absence of polymerized C9.  
186 In serum, complement activation is still ongoing, which could ultimately result in more MAC  
187 on the surface of bacteria and explain why viability still decreases in time. Indeed, stopping  
188 further MAC formation, by adding C5 conversion inhibitor OmCI after 30 minutes, prevented  
189 bacterial killing in C9-depleted serum with C9<sub>TMH-1 lock</sub> over a 100-fold (**Fig. 5c**). Serum also  
190 contains bactericidal enzymes that can more efficiently pass through a damaged OM, such as  
191 lysozyme (14.7 kDa) and type IIa secreted phospholipase 2A (PLA, 14.5 kDa) [31]. Both  
192 lysozyme and PLA decreased bacterial viability when C5b-8 labelled bacteria were incubated  
193 with C9<sub>TMH-1 lock</sub> compared to C5b-8 alone (**S4b**), suggesting that these serum proteins also  
194 contribute to bacterial killing in serum in the absence of polymerized C9. Nonetheless, taken

195 together our data mainly highlight that polymerization of C9 enhances the efficiency by which  
196 MAC pores damage the bacterial cell envelope and kill bacteria in serum.

### 197 **Polymerization of C9 enhances cell envelope damage for several *E. coli* and *Klebsiella*** 198 **strains in serum**

199 We wondered if our findings on *E. coli* MG1655 could also be extrapolated to other *E. coli*  
200 strains and other Gram-negative species. First, the effect of C9 polymerization on OM and IM  
201 damage was measured for three other complement-sensitive *E. coli* strains (BW25113, MC1061  
202 and 547563.1) in serum. To compare strains, time points were interpolated at which the  
203 red:green fluorescence ratio of DiOC<sub>2</sub> reached half the value of the peak ( $t_{1/2\text{peak}}$ , shown in **Fig.**  
204 **5a**) as measure for OM damage, and at which half the maximum Sytox value was reached  
205 ( $t_{1/2\text{maximum}}$ , shown in **Fig. 5b**) as measure for IM damage. Both OM damage (**Fig. 5d, S5a**) and  
206 IM damage (**Fig. 5e, S5b**) were delayed with C9<sub>TMH-1 lock</sub> compared to C9<sub>wt</sub> for all tested *E. coli*  
207 strains. C9<sub>TMH-1 lock</sub> did increase OM damage and IM damage compared to C9-depleted serum  
208 alone for three out of four *E. coli* strains (**Fig. 5d,e and S5a,b**). For one strain, 547563.1, C9<sub>TMH-</sub>  
209 <sub>1 lock</sub> only slightly enhanced IM damage, since C9-depleted serum alone already damaged the  
210 IM of these bacteria (**Fig. 5e, S5b**). OM damage (**Fig. 5d, S5a**) and IM damage (**Fig 5e, S5b**)  
211 were also delayed with C9<sub>TMH-1 lock</sub> compared to C9<sub>wt</sub> for two clinical *Klebsiella* isolates  
212 (*Klebsiella variicola* 402 and *Klebsiella pneumoniae* 567880.1). C9<sub>TMH-1 lock</sub> did not cause IM  
213 damage within 90 minutes for *Klebsiella*, suggesting that for *Klebsiella* IM damage by MAC  
214 pores was more dependent on polymerization of C9 than for *E. coli*. Altogether, these data  
215 suggest that C9 polymerization enhances cell envelope damage for multiple complement-  
216 sensitive *E. coli* and *Klebsiella* strains in serum.

### 217 **Polymerization of C9 is impaired on complement-resistant *E. coli* strains**

218 In our previous study we have identified *E. coli* isolates that survive killing by MAC pores  
219 because MAC does not stably insert into the OM [15]. Here, we wanted to see if C9 polymerizes  
220 on these complement-resistant *E. coli* strains (clinical isolates 552059.1, 552060.1 and  
221 567705.1). All three complement-resistant strains express LPS O-Ag, whereas only one out of  
222 four complement-sensitive strains used in this study did as well (**S6a**). Binding of C9<sub>TMH-1 lock</sub>  
223 in 3% C9-depleted serum was comparable between all strains, suggesting that the total amount  
224 of C5b-8 on the surface was comparable for complement-sensitive and complement-resistant  
225 *E. coli* (**Fig. 6a**). However, for complement-resistant *E. coli* binding of C9<sub>wt</sub> was similar to  
226 C9<sub>TMH-1 lock</sub>, suggesting that C9 did not polymerize (**Fig. 6b**). By contrast, binding of C9<sub>wt</sub> was

227 5- to 15-fold higher than C9<sub>TMH-1 lock</sub> for all four complement-sensitive *E. coli* (**Fig. 6b**). Adding  
228 up to 10-fold more C9 slightly increased the difference between C9<sub>wt</sub> binding and C9<sub>TMH-1 lock</sub>  
229 2- to 3-fold on complement-resistant 552059.1 (**Fig. 6c**), but this difference was still 5-fold  
230 lower compared to complement-sensitive MG1655. Although this suggested that some C9  
231 polymerized on 552059.1, bacteria were still not killed (**S6b**). These data suggest that  
232 polymerization of C9, but not binding of C9 to C5b-8, is impaired on complement-resistant *E.*  
233 *coli*.

234 Finally, our previous study also indicated that although C5b-7 binds to these complement-  
235 resistant *E. coli*, it does not properly anchor to the OM [15]. This improper anchoring of C5b-  
236 7 ultimately resulted in instable insertion of the MAC, which could be mimicked on  
237 complement-sensitive *E. coli* using pC5b6 to assemble MAC [14,15]. In short, MG1655 were  
238 labelled with convertases in 10% C5-depleted serum, washed and afterwards pC5b6 was added  
239 in combination with C7, C8 and C9<sub>wt</sub> or C9<sub>TMH-1 lock</sub>. For this pC5b6-MAC, C9<sub>wt</sub> binding was  
240 2- to 3- fold higher compared to C9<sub>TMH-1 lock</sub> (**Fig. 6c**), resembling the difference in binding seen  
241 for complement-resistant *E. coli* 552059.1. By contrast, when convertases on MG1655  
242 converted C5 and directly assembled MAC pores (conv-MAC), C9<sub>wt</sub> binding was 12-fold  
243 higher compared to C9<sub>TMH-1 lock</sub> (**Fig. 6c**). Altogether, these data suggest that improper  
244 anchoring of C5b-7 results in impaired polymerization of C9 on complement-resistant *E. coli*.

## 245 **Discussion**

246 Understanding how MAC pores damage the bacterial cell envelope and kill bacteria is  
247 important to understand how the complement system prevents infections. Although it was still  
248 unclear whether a completely assembled MAC pore is needed to kill bacteria, we here show  
249 that it is important to efficiently damage the bacterial cell envelope and rapidly kill multiple  
250 Gram-negative bacterial strains and species.

251 Our findings suggest that bacteria are killed more rapidly when C9 polymerizes, both by MAC  
252 alone as well as in a serum environment. Previous reports have already suggested that the  
253 absence of C9 delays bacterial killing [32], and have correlated the presence of polymeric-C9  
254 to bacterial killing [33,34]. Our study extends on these insights, since it provides direct evidence  
255 that polymerization of C9 enhances bacterial killing by using a system in which C9 can bind to  
256 C5b-8 without polymerizing. Although Spicer *et al.* had already suggested that locking the  
257 TMH-1 domain of C9 could prevent polymerization of C9, we here validate that this does not  
258 affect binding of C9 to C5b-8 [27]. Apart from bacterial killing, our study also suggests that



259 polymerization of C9 more efficiently damages both the OM and IM of the bacterial cell  
260 envelope. Polymerization of C9 greatly enhanced passage of small molecules through the OM  
261 and was required for passage of periplasmic proteins through the OM. OM damage preceded  
262 IM damage, corresponding with our earlier findings [14]. Here, we add to these insights  
263 showing that OM damage also precedes the loss of IM potential, which is a widely accepted  
264 characteristic of cell death.

265 Based on our results, we therefore hypothesize that extensive OM damage by MAC pores is  
266 driving bacterial killing. Binding of C8 to C5b-7 allows passage of small molecules through the  
267 OM (**Fig 7-I**), but these lesions have minimal effect on the IM and bacterial viability. Binding  
268 of C9 to C5b-8 without polymerization of C9 slightly increases damage to both the OM and IM  
269 (**Fig 7-II**). Although some residual polymerization of C9<sub>TMH-1 lock</sub> can never be fully excluded,  
270 our data do not show any direct evidence that C9<sub>TMH-1 lock</sub> polymerized. Based on the structure  
271 of monomeric-C9 [27], it is highly unlikely that the other TMH domain (TMH-2) of C9 can  
272 insert into the membrane when the TMH-1 domain is locked. Binding of C9 to C5b-8 without  
273 polymerization of C9 could affect the stability by which C8 is inserted into the membrane,  
274 which ultimately could affect OM damage. Nonetheless, our data highlight that polymerization  
275 of C9 drastically enhanced the damage of both the OM and IM damage and rapidly killed  
276 bacteria (**Fig 7-III**). Our study therefore primarily emphasizes that polymerization of C9  
277 strongly enhances bacterial cell envelope damage and killing.

278 How OM damage by MAC pores destabilizes the IM and kills bacteria remains unclear. The  
279 OM is an essential load-bearing membrane that confers stability to the bacterial cell [35]. The  
280 extent of OM damage by MAC pores could therefore determine whether a cell can cope with  
281 the increase in osmotic pressure. OM damage by MAC pores could even directly interfere with  
282 osmoregulation of the cell, as has been suggested for antimicrobial peptides that damage the  
283 OM of *E. coli* [36]. Moreover, since metabolism and growth-phase have been associated with  
284 sensitivity to killing by MAC pores [37,38], OM damage could also induce a stress response  
285 that affects the capacity of a cell to survive envelope stress. C9-depleted serum alone damaged  
286 the IM for one *E. coli* strain, even though the amount of C5b-8, indicated by the binding of  
287 C9<sub>TMH-1 lock</sub>, and OM damage was comparable to other *E. coli* strains. On the other hand, for  
288 *Klebsiella* strains IM damage appeared more dependent on polymerization of C9 than for *E.*  
289 *coli* strains. These differences between strains and species could suggest that the capacity of a  
290 bacterium to cope with OM damage-related stress is a crucial determinant for bacterial killing

291 by MAC pores. Further research looking directly at the cellular response of bacteria would be  
292 necessary to better understand how OM damage by MAC pores causes cell death.

293 Our data also suggest that polymerization of C9 is rate-limiting in the assembly of complete  
294 MAC pores on bacteria. Joiner *et al.* already demonstrated that limiting the C9 concentration  
295 decreased the ratio of C9:C7 on the surface [33]. We further extend on these insights, as our  
296 data also suggest that binding of C9 to C5b-8 is favoured over binding to an already unfurled  
297 C9 molecule in the nascent polymeric-C9 ring. By contrast, Parsons *et al.* [30] recently  
298 suggested that binding of C9 to C5b-8 is a kinetic bottleneck in the assembly of complete MAC  
299 pores. However, this study looked at MAC assembly in the presence of an excess of C9, which  
300 we here show to affect the assembly kinetics of MAC pores. Moreover, experiments in this  
301 study were done on model lipid-membranes that were not labelled with convertases, which also  
302 could have influenced the assembly of MAC pores [14].

303 Finally, our study highlights that polymerization of C9 is specifically impaired on *E. coli* that  
304 resist MAC-dependent killing. We have previously shown that C5b-7 could bind to these  
305 complement-resistant strains, but was improperly anchored to the OM which resulted in  
306 unstably inserted MAC [15]. Here, we extend on these findings showing that this improper  
307 anchoring of C5b-7 results in impaired polymerization of C9. How these complement-resistant  
308 *E. coli* affect the anchoring of C5b-7 and subsequent polymerization of C9 remains unclear.  
309 Polymerization of C9 correlated with the absence of LPS O-Ag in the *E. coli* strains used in this  
310 study. The presence and length of LPS O-Ag have been correlated with survival in serum before  
311 [23], and are thought to affect the distance of the nascent MAC to the OM and the accessibility  
312 of hydrophobic patches in the OM [8]. We therefore hypothesize that improper anchoring of  
313 C5b-7 initiates assembly of MAC further away from hydrophobic patches in the OM, which  
314 could prevent stable insertion of the nascent polymeric-C9 ring and result in an incomplete  
315 polymeric-C9 ring. Although LPS O-Ag modifications can also affect earlier steps in the  
316 complement cascade [9,10,39–41], this did not seem to play a role as the amount of C5b-8 on  
317 the surface was comparable between complement-sensitive and -resistant *E. coli*. Nonetheless,  
318 a more direct study of the effect of O-Ag on polymerization of C9 would be required to verify  
319 this hypothesis.

320 In conclusion, our study provides insight into how MAC pores damage the bacterial cell  
321 envelope and kill Gram-negative bacteria. Moreover, our study highlights how bacteria resist  
322 killing by MAC pores. These fundamental insights are important to understand how the  
323 complement system prevents infections and how bacteria escape killing by the immune system.

324 Ultimately, these insights may guide the development of future immune therapy against  
325 bacteria.

## 326 Materials & Methods

### 327 **Serum and complement proteins**

328 Serum depleted of complement components C5, C8 or C9 was obtained from Complement  
329 Technology. Serum was thawed and aliquoted, but not subjected to any further freeze-thaw  
330 cycles. Preassembled C5b6 (pC5b6) and C8 were also obtained from Complement Technology.  
331 His-tagged complement components C5, C6 and C7 were expressed in HEK293E cells at U-  
332 Protein Express as described previously [15]. OmCI was produced in HEK293E cells at U-  
333 Protein Express as well and purified as described before [42]. Monoclonal mouse-anti poly-C9  
334 (maE11, kindly provided by T. Mollness and P. Garred) was randomly labelled with NHS-Alexa  
335 Fluor AF488 (ThermoFisher) according to manufacturer's protocol. Lysozyme was obtained  
336 from Raybio and recombinant type IIa secreted phospholipase 2A (PLA) was kindly provided  
337 by Gérard Lambeau [43].

338

### 339 **Expression and purification of C9**

340 C9<sub>wt</sub> and C9<sub>TMH-1 lock</sub> (F262C V405C) were cloned into the vector pcDNA34 (Thermo Fisher  
341 Scientific) that was modified with an NheI/NotI multiple cloning site. This vector contains a  
342 cystatin-S signal peptide and was further modified to encode for the expression of a C-terminal  
343 AAA-3x(GGGGS)-LPETGG-HHHHHH tag. gBlocks (Integrated DNA Technologies)  
344 containing codon optimized C9 sequences were cloned via Gibson assembly into the NheI/NotI  
345 digested pcDNA34 and transformed into Top10F *E. coli*. After verification of the correct  
346 sequence, the plasmids were used to transfect EXPI293F cells. EXPI293F cells were grown in  
347 EXPI293 medium (Life Technologies) in culture filter cap Erlenmeyer bottles (Corning) on a  
348 rotation platform (125 rotations/min) at 37°C, 8% CO<sub>2</sub>. One day before transfection, cells were  
349 diluted to 2x10<sup>6</sup> cells/ml. The next day, cells were diluted to 2x10<sup>6</sup> cells/ml using  
350 SFM4Transfx-293 medium, containing UltraGlutamine I (VWR International) prior to  
351 transfection using PEI (Polyethylenimine HCl MAX; Polysciences). 0.5 µg DNA/ml cells,  
352 containing 50% empty (dummy) vector, was added to Opti-MEM (1:10 of total volume; Gibco)  
353 and gently mixed. After adding 1 µg/ml PEI in a PEI/DNA (w/w) ratio of 5:1, the mixture was  
354 incubated at room temperature for 20 min and added dropwise to cells while manually rotating  
355 the culture flask. After 3.5 hours, 1 mM valproic acid (Sigma) was added. After 5 days of

356 expression, the cell supernatant was collected by centrifugation and filtration (0.45  $\mu\text{m}$ ). Cell  
357 supernatant was diafiltrated over a 30 kDa membrane on a Quixstand (GE healthcare) to  
358 Tris/NaCl buffer (50 mM Tris/500 mM NaCl at pH 8.0). Proteins were finally loaded on a  
359 HisTrap HP Chelating column (GE healthcare) in Tris/NaCl buffer supplemented with 40 mM  
360 imidazole and eluted with 150 mM imidazole. Final purification was done by size-exclusion  
361 chromatography (SEC) on a Superdex 200 Increase column (GE Healthcare) on an Akta  
362 Explorer (GE Healthcare) with PBS. The concentration of proteins was determined by  
363 measuring absorbance at 280 nm and verified by SDS-PAGE.

364

### 365 **Site-specific fluorescent labelling of MAC components**

366 C6 and C9 were labelled with fluorescent probes as described previously [14,15]. 50  $\mu\text{M}$  of  
367 protein with C-terminal LPETGG-His tag was incubated with 25  $\mu\text{M}$  His-tagged sortase-A7+  
368 [44] and 1 mM GGG-substrate in Tris/NaCl buffer (50 mM Tris/300 mM NaCl at pH 7.8) for  
369 two hours at 4  $^{\circ}\text{C}$ . GGGK-FITC (Isogen Life Science) was used for C6-LPETGG-His and  
370 GGGK-azide (Genscript) for C9-LPETGG-His. Sortagged proteins were purified on a HisTrap  
371 FF column (GE Healthcare), which captures protein that was not sortagged and still contains a  
372 His-tag. FITC-labelled C6 was directly purified by SEC on a Superdex 200 Increase column on  
373 the Akta Explorer with PBS. GGG-azide labelled proteins were concentrated to 25  $\mu\text{M}$  on a 30  
374 kDa Amicon Tube (Merck Millipore) in Tris/NaCl buffer and next labelled with 100  $\mu\text{M}$   
375 DBCO-Cy5 (Sigma Aldrich) via copper-free click chemistry for 3h at 4  $^{\circ}\text{C}$ . Finally, Cy5-  
376 labelled proteins were also purified by SEC on a Superdex 200 Increase column with PBS.  
377 Labelling of the proteins was monitored during SEC by measuring absorbance at 280 nm  
378 (protein), 488 nm (FITC) and 633 nm (Cy5) nm and finally verified by SDS-PAGE by  
379 measuring in-gel fluorescence with LAS4000 Imagequant (GE Healthcare).

### 380 **Bacterial strains**

381 Unless otherwise specified, the common laboratory *E. coli* strain MG1655 was used in our  
382 experiments. For experiments where leakage of periplasmic mCherry was measured, MG1655  
383 was used transformed with pPerimCh containing a constitutively expressed periplasmic  
384 mCherry (*perimCherry*) previously used in [14]. Other laboratory *E. coli* strains that were used  
385 in this study included BW25113 and MC1061. Clinical isolates, namely *E. coli* 547563.1,  
386 552059.1, 552060.1, 567705.1, *Klebsiella variicola* 402 and *Klebsiella pneumoniae* 567880.1,  
387 were obtained from the clinical Medical Microbiology department at the University Medical  
388 Center Utrecht.

## 389 **Bacterial growth**

390 For all experiments, bacteria were plated on Lysogeny Broth (LB) agar plates. Single colonies  
391 were picked and grown overnight at 37 °C in LB medium. For MG1655 transformed with  
392 pPerimCh, LB was supplemented with 100 µg/ml ampicillin. The next day, subcultures were  
393 grown by diluting at least 1/30 and these were grown to mid-log phase (OD600 between 0.4 –  
394 0.6). Once grown to mid-log phase, bacteria were washed by centrifugation three times (11000  
395 rcf for 2 minutes) and resuspended to OD 1.0 (~1 x 10<sup>9</sup> bacteria/ml) in RPMI (Gibco) + 0.05%  
396 human serum albumin (HSA, Sanquin).

## 397 **Complement labelling and serum bactericidal assays**

398 For MAC-specific bactericidal assays, bacteria were labelled with C5b-7 as described  
399 previously [15]. In short, bacteria (~1 x 10<sup>8</sup> bacteria/ml) were incubated with 10 % C8-depleted  
400 serum for 30 minutes at 37 °C, washed three times and resuspended in RPMI-HSA. C5b-7  
401 labelled bacteria (~5 x 10<sup>7</sup> bacteria/ml) were incubated for 30 minutes at 37 °C with 10 nM C8  
402 and 20 nM C9, unless stated differently. When C9 was reduced with 10 mM dithiothreitol  
403 (DTT), 20 nM C8 was added to bacteria (~5 x 10<sup>7</sup> bacteria/ml) 15 minutes at RT before C9 was  
404 added to allow binding of C8 to C5b-7. To label bacteria with convertases, bacteria (~1 x 10<sup>8</sup>  
405 bacteria/ml) were incubated with 10 % C5-depleted serum for 30 minutes at 37 °C as described  
406 previously [14,15]. Washing steps were done by pelleting bacteria at 11,000 rcf for 2 minutes  
407 and washing with RPMI-HSA. For serum bactericidal assays, bacteria (~5 x 10<sup>7</sup> bacteria/ml)  
408 were incubated with 3% C9-depleted serum supplemented with physiological concentrations of  
409 C9 (100% serum ± 1 µM) for 30 minutes at 37 °C, unless stated differently. KP880.1 was  
410 incubated in 10% C9-depleted serum with the corresponding physiological concentration of C9.  
411 Blocking of C5 conversion in serum was done with 25 µg/ml OmCI as final concentration. For  
412 assays where nisin (Handary, SA, Brussels) was added, 3 µg/ml was used as final concentration.

## 413 **Flow cytometry**

414 Complement-labelled bacteria (~5 x 10<sup>7</sup> bacteria/ml) were incubated with 2.5 µM of Sytox Blue  
415 Dead Cell stain (Thermofisher). Samples were diluted to ~2.5 x 10<sup>6</sup> bacteria/ml in RPMI-HSA  
416 and subsequently analyzed on a MACSquant VYB (Miltenyi Biotech) for Sytox and  
417 <sub>peri</sub>mCherry fluorescence. Poly-C9 deposition was measured by incubating bacteria (2.5 x 10<sup>7</sup>  
418 bacteria/ml) with 6 µg/ml monoclonal AF488 labelled mouse-anti poly-C9 (maE11) for 30  
419 minutes at 4 °C. For C9 binding in serum, bacteria were stained with 1 µM Syto9  
420 (Thermofisher) to exclude serum noise events. Samples were next diluted to ~2.5 x 10<sup>6</sup>

421 bacteria/ml in 1.1% paraformaldehyde and subsequently analyzed on the BD FACSVersé flow  
422 cytometer for Cy5 and maE11-AF488 or Syto9 fluorescence. Flow cytometry data was analysed  
423 in FlowJo V.10. Bacteria were gated on forward scatter and side scatter. In serum, an additional  
424 trigger was placed on Syto9 fluorescence. Sytox positive cells were gated such that the buffer  
425 only control had <1 % positive cells.

#### 426 **Poly-C9 detection by SDS-PAGE**

427 Bacterial labelled with complement components were collected by spinning bacteria down  
428 11,000 rcf for 2 minutes and subsequently washing cell pellets twice in RPMI-HSA. Cell pellets  
429 were resuspended and diluted 1:1 in SDS sample buffer (0.1M Tris (pH 6.8), 39% glycerol,  
430 0.6% SDS and bromophenol blue) supplemented with 50 mg/ml DTT and placed at 95 °C for  
431 5 minutes. Samples were run on a 4-12% Bis-Tris gradient gel (Invitrogen) for 75 minutes at  
432 200V. Gels were imaged for 10 minutes with increments of 30 seconds on the LAS4000  
433 Imagequant (GE Healthcare) for in-gel Cy5 fluorescence. Monomeric-C9 (mono-C9) and  
434 polymeric-C9 (poly-C9) were distinguished by size, since mono-C9 runs at 63 kDa and poly-  
435 C9 is retained in the comb of the gel.

#### 436 **Bacterial viability assay**

437 Bacteria were treated with MAC components or serum as described above. Next, colony  
438 forming units (CFU) were determined by making serial dilutions in PBS (100, 1,000, 10,000  
439 and 100,000-fold). Serial dilutions were plated in duplicate on LB agar plates and incubated  
440 overnight at 37 °C. The next day, colonies were counted and the corresponding concentration  
441 of CFU/ml was calculated.

#### 442 **Multi-well fluorescence assays**

443 Bacteria ( $\sim 5 \times 10^7$  bacteria/ml) added to RPMI-HSA supplemented with 1  $\mu$ M of Sytox Green  
444 Dead Cell stain (ThermoFisher) or 30  $\mu$ M DiOC<sub>2</sub> (PromoCell). Bacteria were next incubated  
445 with MAC components, serum and/or nisin as described above. Fluorescence was measured  
446 every 60 seconds on a Clariostar platereader (BMG labtech). Sytox green fluorescence was  
447 measured using an excitation wavelength of 484-15 nm and emission wavelength of 527-20.  
448 DiOC<sub>2</sub> fluorescence was measured using an excitation wavelength 484-15 nm and emission  
449 wavelength of 527-20 (green) and 650-24 (red). For DiOC<sub>2</sub>, the red fluorescence was divided  
450 by the green fluorescence to determine the red:green fluorescence ratio.  $t_{1/2peak}$  for DiOC<sub>2</sub> was

451 interpolated at half the value of the peak, which was calculated by subtracting the background  
452 ratio value at  $t=0$  from the peak ratio value and dividing by two.  $t_{1/2\text{maximum}}$  for Sytox was  
453 interpolated at half the value of the maximum Sytox value, which was calculated by  
454 subtracting the fluorescence value at  $t=0$  from the maximum fluorescence value and dividing  
455 by two.

#### 456 **LPS O-antigen Silver staining**

457 *E. coli* strains were typed for LPS O-Ag by Silver staining after SDS-PAGE based on [45,46].  
458 In short, bacteria were scraped from blood agars plates in PBS and incubated at 56 °C for 60  
459 minutes. Cell pellets were next deproteinated with 400 µg/ml proteinase K for 90 minutes and  
460 diluted in 2x Laemli buffer with 0.7 M beta-mercaptoethanol. Cell pellets were run on a 4-12%  
461 BisTris gel as described above and fixed overnight in fixing buffer (40% ethanol + 4% glacial  
462 acetic acid). The gel was oxidized for 5 minutes in fixing buffer supplemented with 0.6%  
463 periodic acid. The gel was then stained for 15 minutes with freshly prepared 0.3% silver nitrate  
464 in 0.125 M sodium hydroxide and 0.3% ammonium hydroxide. Finally, the gel was developed  
465 for 7 minutes in developer solution (0.25% citric acid + and 0.2% formaldehyde). In between  
466 steps, the gel was washed three times with MilliQ. Lipid A and LPS core were distinguished  
467 from LPS O-Ag based on size.

#### 468 **Data analysis and statistical testing**

469 Unless stated otherwise, graphs are comprised of at least three biological replicates. Statistical  
470 analyses were performed in GraphPad Prism 8 and are further specified in the figure legends.

#### 471 Acknowledgements

472 This work was funded by an ERC Starting grant (639209-ComBact, to S.H.M.R). The authors  
473 would like to acknowledge Lisanne de Vor and Myrthe Reiche for critically reading the  
474 manuscript.

#### 475 Author contributions

476 D.J.D., S.H.M. and B.W.B. conceived the project and designed the experiments. D.J.D. and  
477 C.J.C.H. performed protein purifications and fluorescent labelling. D.J.D. performed poly-C9  
478 detection by SDS-PAGE. D.J.D., D.A.C.H., M.R. and B.W.B. performed flow cytometry,  
479 multiwell fluorescence and bacterial killing assays. P.C.A. performed LPS O-Ag typing with  
480 input from D.A.C.S. D.J.D., D.A.C.H., M.R., D.A.C.S., S.H.M., B.W.B. analyzed the data.

481 D.J.D., S.H.M. and B.W.B. wrote the manuscript with input from D.A.C.H., D.A.C.S. All  
482 authors approved the final version of the manuscript.

### 483 Competing interests

484 The authors declare no competing interests.

### 485 References

- 486 1. Taylor PW. Bactericidal and bacteriolytic activity of serum against gram-negative  
487 bacteria. *Microbiol Rev.* 1983;47(1):46–83.
- 488 2. Joiner KA, Brown EJ, Frank MM. Complement and bacteria. *Annu Rev Immunol.*  
489 1984;2:461–91.
- 490 3. Doorduijn DJ, Rooijackers SHM, Heesterbeek DAC. How the Membrane Attack  
491 Complex Damages the Bacterial Cell Envelope and Kills Gram-Negative Bacteria.  
492 *Bioessays.* 2019;41(10):e1900074.
- 493 4. Gasque P. Complement: A unique innate immune sensor for danger signals. *Mol*  
494 *Immunol.* 2004;41(11 SPEC. ISS.):1089–98.
- 495 5. Merle NS, Church SE, Fremeaux-Bacchi V, Roumenina LT. Complement system part I  
496 - molecular mechanisms of activation and regulation. *Front Immunol.* 2015;6(JUN):1–  
497 30.
- 498 6. Bhakdi S, Trantum-Jensen J. Molecular nature of the complement lesion. *Proc Natl Acad*  
499 *Sci U S A.* 1978;75(11):5655–9.
- 500 7. Müller-Eberhard HJ. The membrane attack complex of complement. *Annu Rev*  
501 *Immunol.* 1986;4:503–28.
- 502 8. Joiner KA. Complement evasion by bacteria and parasites. *Annu Rev Microbiol.* 1988  
503 May;42(4):201–30.
- 504 9. Merino S, Camprubi S, Alberti S, Benedi VJ, Tomas JM. Mechanisms of *Klebsiella*  
505 *pneumoniae* resistance to complement-mediated killing. *Infect Immun.*  
506 1992;60(6):2529–35.
- 507 10. Doorduijn DJ, Rooijackers SHM, van Schaik W, Bardoel BW. Complement resistance  
508 mechanisms of *Klebsiella pneumoniae*. *Immunobiology.* 2016 Oct;221(10):1102–9.



- 509 11. Abreu AG, Barbosa AS. How *Escherichia coli* Circumvent Complement-Mediated  
510 Killing. *Front Immunol.* 2017;8(April):1–6.
- 511 12. Bayly-Jones C, Bubeck D, Dunstone MA. The mystery behind membrane insertion: A  
512 review of the complement membrane attack complex. *Philos Trans R Soc B Biol Sci.*  
513 2017;372(1726).
- 514 13. DiScipio RG, Linton SM, Rushmere NK. Function of the factor I modules (FIMS) of  
515 human complement component C6. *J Biol Chem.* 1999;274(45):31811–8.
- 516 14. Heesterbeek DA, Bardoel BW, Parsons ES, Bennett I, Ruyken M, Doorduijn DJ, et al.  
517 Bacterial killing by complement requires membrane attack complex formation via  
518 surface-bound C5 convertases. *EMBO J.* 2019 Feb 15;38(4):1–17.
- 519 15. Doorduijn DJ, Bardoel BW, Heesterbeek DAC, Ruyken M, Benn G, Parsons ES, et al.  
520 Bacterial killing by complement requires direct anchoring of membrane attack complex  
521 precursor C5b-7. *PLoS Pathog.* 2020;16(6 June):1–23.
- 522 16. Brannen CL, Sodetz JM. Incorporation of human complement C8 into the membrane  
523 attack complex is mediated by a binding site located within the C8beta MACPF domain.  
524 *Mol Immunol.* 2007;44(5):960–5.
- 525 17. Sharp TH, Koster AJ, Gros P. Heterogeneous MAC Initiator and Pore Structures in a  
526 Lipid Bilayer by Phase-Plate Cryo-electron Tomography. *Cell Rep.* 2016;15(1):1–8.
- 527 18. Serna M, Giles JL, Morgan BP, Bubeck D. Structural basis of complement membrane  
528 attack complex formation. *Nat Commun.* 2016;7:10587.
- 529 19. Menny A, Serna M, Boyd CM, Gardner S, Praveen Joseph A, Paul Morgan B, et al.  
530 CryoEM reveals how the complement membrane attack complex ruptures lipid bilayers.  
531 *Nat Commun.* 2018;(2018):1–11.
- 532 20. Bhakdi S, Trantum-Jensen J. C5b-9 assembly: Average binding of one C9 molecule to  
533 C5b-8 without poly-C9 formation generates a stable transmembrane pore. *J Immunol.*  
534 1986;136(8):2999–3005.
- 535 21. Wang L, Wang Q, Reeves PR. The Variation of O Antigens in Gram-Negative Bacteria.  
536 In: *Biochemistry.* 2010. p. 123–52.
- 537 22. Liu B, Furevi A, Perepelov A V., Guo X, Cao H, Wang Q, et al. Structure and genetics

- 538 of *Escherichia coli* O antigens. *FEMS Microbiol Rev.* 2020;44(6):655–83.
- 539 23. Grossman N, Schmetz MA, Foulds J, Klima EN, Jimenez-Lucho VE, Leive LL, et al.  
540 Lipopolysaccharide size and distribution determine serum resistance in *Salmonella*  
541 *montevideo*. *J Bacteriol.* 1987;169(2):856–63.
- 542 24. Miglioli PA, Toni M. Serum sensitivity of *Escherichia coli* strains present in the clinical  
543 environment. *J Chemother.* 1989 Jun;1(3):162–3.
- 544 25. Silhavy TJ, Kahne D, Walker S. The bacterial cell envelope. *Cold Spring Harb Perspect*  
545 *Biol.* 2010;2(5):a000414.
- 546 26. Heesterbeek DAC, Martin NI, Velthuisen A, Duijst M, Ruyken M, Wubbolts R, et al.  
547 Complement-dependent outer membrane perturbation sensitizes Gram-negative bacteria  
548 to Gram-positive specific antibiotics. *Sci Rep.* 2019;9(1):1–10.
- 549 27. Spicer BA, Law RHP, Caradoc-Davies TT, Ekkel SM, Bayly-Jones C, Pang S-S, et al.  
550 The first transmembrane region of complement component-9 acts as a brake on its self-  
551 assembly. *Nat Commun.* 2018 Dec 15;9(1):3266.
- 552 28. Podack ER, Tschopp J. Circular polymerization of the ninth component of complement.  
553 Ring closure of the tubular complex confers resistance to detergent dissociation and to  
554 proteolytic degradation. *J Biol Chem.* 1982;257(24):15204–12.
- 555 29. Mollnes TE, Lea T, Frøland SS, Harboe M. Quantification of the terminal complement  
556 complex in human plasma by an enzyme-linked immunosorbent assay based on  
557 monoclonal antibodies against a neoantigen of the complex. *Scand J Immunol.* 1985  
558 Aug;22(2):197–202.
- 559 30. Parsons ES, Stanley GJ, Pyne ALB, Hodel AW, Nievergelt AP, Menny A, et al. Single-  
560 molecule kinetics of pore assembly by the membrane attack complex. *Nat Commun.*  
561 2019;10(1):472274.
- 562 31. Heesterbeek DAC, Muts RM, van Hensbergen VP, de Saint Aulaire P, Wennekes T,  
563 Bardoel BW, et al. Outer membrane permeabilization by the membrane attack complex  
564 sensitizes Gram-negative bacteria to antimicrobial proteins in serum and phagocytes.  
565 *PLoS Pathog.* 2021;17(1):1–22.
- 566 32. Harriman GR, Esser AF, Podack ER, Wunderlich AC, Braude AI, Lint TF, et al. The  
567 role of C9 in complement-mediated killing of *Neisseria*. *J Immunol.* 1981

- 568 Dec;127(6):2386–90.
- 569 33. Joiner KA, Schmetz MA, Sanders ME, Murray TG, Hammer CH, Dourmashkin R, et al.  
570 Multimeric complement component C9 is necessary for killing of *Escherichia coli* J5 by  
571 terminal attack complex C5b-9. Proc Natl Acad Sci U S A. 1985;82(14):4808–12.
- 572 34. Bloch EF, Schmetz MA, Foulds J, Hammer CH, Frank MM, Joiner KA. Multimeric C9  
573 within C5b-9 is required for inner membrane damage to *Escherichia coli* J5 during  
574 complement killing. J Immunol. 1987;138(3):842–8.
- 575 35. Rojas ER, Billings G, Odermatt PD, Auer GK, Zhu L, Miguel A, et al. The outer  
576 membrane is an essential load-bearing element in Gram-negative bacteria. Nature.  
577 2018;559(7715):617–21.
- 578 36. Hartmann M, Berditsch M, Hawecker J, Ardakani MF, Gerthsen D, Ulrich AS. Damage  
579 of the bacterial cell envelope by antimicrobial peptides gramicidin S and PGLa as  
580 revealed by transmission and scanning electron microscopy. Antimicrob Agents  
581 Chemother. 2010;54(8):3132–42.
- 582 37. Taylor PW, Kroll HP. Killing of an encapsulated strain of *Escherichia coli* by human  
583 serum. Infect Immun. 1983;39(1):122–31.
- 584 38. Barnes MG, Weiss AA. Growth phase influences complement resistance of *Bordetella*  
585 *pertussis*. Infect Immun. 2002;70(1):403–6.
- 586 39. Sansano M, Reynard AM, Cunningham RK. Inhibition of serum bactericidal reaction by  
587 lipopolysaccharide. Infect Immun. 1985;48(3):759–62.
- 588 40. Bravo D, Silva C, Carter JA, Hoare A, Alvarez SA, Blondel CJ, et al. Growth-phase  
589 regulation of lipopolysaccharide O-antigen chain length influences serum resistance in  
590 serovars of *Salmonella*. J Med Microbiol. 2008 Aug 1;57(8):938–46.
- 591 41. Miajlovic H, Smith SG. Bacterial self-defence: How *Escherichia coli* evades serum  
592 killing. FEMS Microbiol Lett. 2014;354(1):1–9.
- 593 42. Nunn M a, Sharma A, Paesen GC, Adamson S, Lissina O, Willis AC, et al. Complement  
594 inhibitor of C5 activation from the soft tick *Ornithodoros moubata*. J Immunol.  
595 2005;174(4):2084–91.
- 596 43. Ghomashchi F, Brglez V, Payré C, Jeammet L, Bezzine S, Gelb MH, et al. Preparation

597 of the Full Set of Recombinant Mouse- and Human-Secreted Phospholipases A2. 1st ed.  
598 Vol. 583, Methods in Enzymology. Elsevier Inc.; 2017. 35–69 p.

599 44. Jeong HJ, Abhiraman GC, Story CM, Ingram JR, Dougan SK. Generation of Ca<sup>2+</sup>-  
600 independent sortase A mutants with enhanced activity for protein and cell surface  
601 labeling. PLoS One. 2017;12(12):1–15.

602 45. Hitchcock PJ, Brown TM. Morphological heterogeneity among *Salmonella*  
603 lipopolysaccharide chemotypes in silver-stained polyacrylamide gels. J Bacteriol.  
604 1983;154(1):269–77.

605 46. Chart H. Lipopolysaccharide chemotyping. Methods Mol Biol. 1995;46:41–8.

606

607

608 **Figure 1 – C9<sub>TMH-1 lock</sub> binds to C5b-8, but its capacity to form polymers is impaired on**  
 609 ***E. coli***

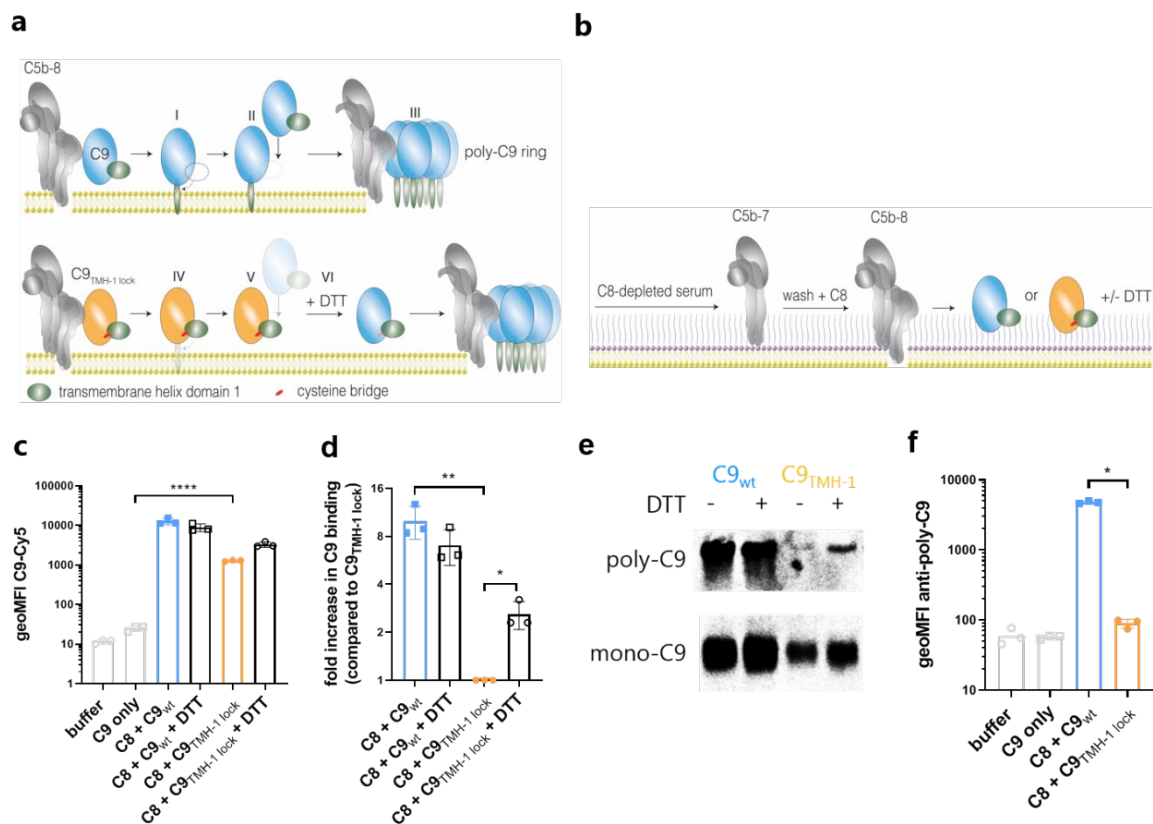

610

611 a) Schematic overview of C9 polymerization. Binding of C9 (blue) to C5b-8 (grey) triggers  
 612 unfurling of the TMH-1 domain of C9 (green) and subsequent insertion into the membrane (I).  
 613 Unfurling of TMH-1 exposes the elongation surface of C9 to bind a subsequent C9 monomer  
 614 (II). Ultimately, this results in the formation of a C9 polymer (III). Locking the TMH-1 domain  
 615 of C9 (orange, C9<sub>TMH-1 lock</sub>) with an intramolecular cysteine bridge (red) prevents unfurling of  
 616 the TMH-1 domain when C9 binds to C5b-8 (IV). This also prevents exposure of the elongation  
 617 surface of C9<sub>TMH-1 lock</sub> and subsequent polymerization (V). Reducing the cysteine bridge of  
 618 C9<sub>TMH-1 lock</sub> with DTT restores its capacity to form polymers (VI). b) Schematic overview of  
 619 labelling *E. coli* MG1655 with MAC. *E. coli* is labelled with C5b-7 by incubating them in 10%  
 620 C8-depleted serum for 30 minutes. Bacteria are washed and next incubated with 10 nM C8 for  
 621 15 minutes. Finally, 20 nM of Cy5-labelled C9<sub>wt</sub> or C9<sub>TMH-1 lock</sub> is added in the presence or  
 622 absence of 10 mM DTT for 30 minutes to measure C9 binding. c) Binding of Cy5-labelled C9<sub>wt</sub>  
 623 or C9<sub>TMH-1 lock</sub> to bacteria treated as described in b and measured by flow cytometry. d) Binding  
 624 of Cy5-labelled C9 in c was divided by the fluorescence of bacteria labelled with C8 + C9<sub>TMH-</sub>  
 625 1 lock to calculate the relative binding difference as indication for polymerization of C9. e)

626 Bacterial cell pellets were analyzed by SDS-PAGE for in-gel fluorescence of Cy5-labelled C9<sub>wt</sub>  
627 or C9<sub>TMH-1 lock</sub> to distinguish monomeric-C9 (mono-C9) from polymeric-C9 (poly-C9). f)  
628 Bacteria were stained with AF488-labelled mouse anti-poly-C9 aE11-antibody and staining  
629 was measured by flow cytometry. Flow cytometry data are represented by individual geoMFI  
630 values of the bacterial population. SDS-PAGE images are representative for at least three  
631 independent experiments. Data represent individual values of three independent experiments  
632 with mean +/- SD. Statistical analysis was done on log-transformed data (<sup>10</sup>log for c, f and <sup>2</sup>log  
633 for d) using a paired one-way ANOVA with Tukey's multiple comparisons' test. Significance  
634 was shown as \*  $p \leq 0.05$ , \*\*  $p \leq 0.005$ , \*\*\*\*  $p \leq 0.0001$ .

635

636 **Figure 2 – Polymerization of C9 enhances bacterial killing by MAC pores**

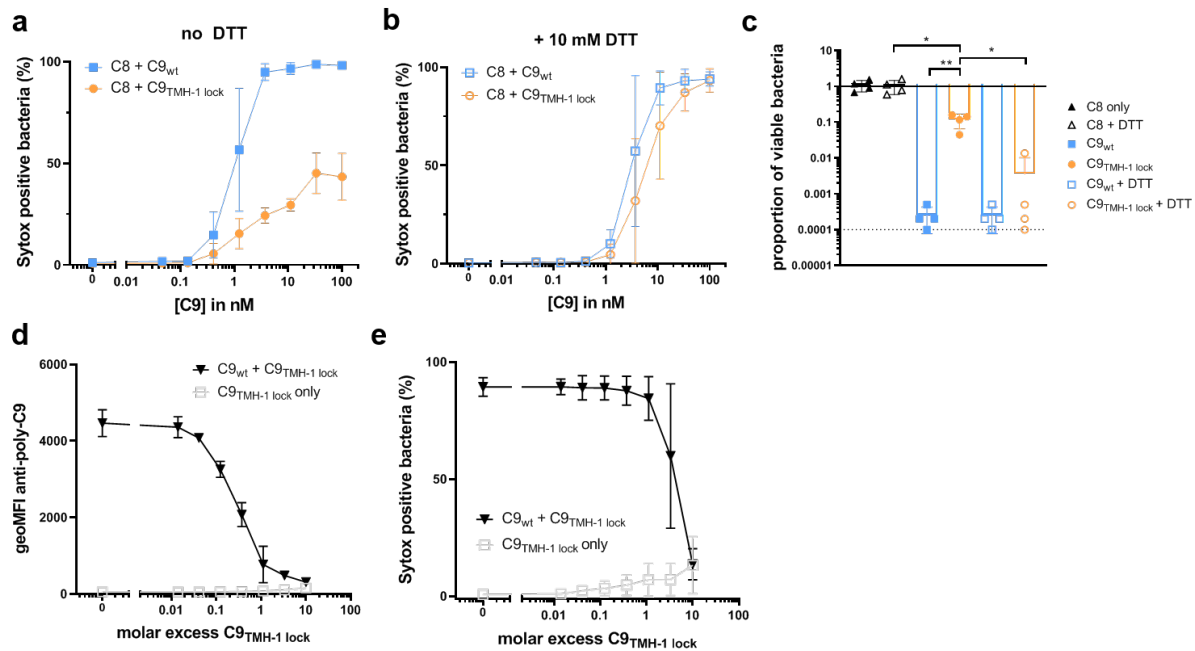

637

638 *E. coli* MG1655 were labelled with C5b-7 by incubating them in 10% C8-depleted serum for  
 639 30 minutes. Bacteria were washed and next incubated with 10 nM C8 for 15 minutes. a-c) A  
 640 concentration range of C9<sub>wt</sub> or C9<sub>TMH-1 lock</sub> was added in the absence (a) or presence (b) of 10  
 641 mM DTT for 30 minutes. Sytox was used to determine the percentage of cells that have a  
 642 damaged bacterial IM by flow cytometry as read-out for bacterial killing. c) At 100 nM C9,  
 643 bacterial viability was determined by counting colony forming units (CFU's) and calculating  
 644 the proportion of viable cells compared to C5b-7 labelled bacteria in buffer. The horizontal  
 645 dotted line represents the detection limit of the assay. d-e) C5b-8 labelled bacteria were  
 646 incubated for 30 minutes with 20 nM C9<sub>wt</sub> and a concentration range of C9<sub>TMH-1 lock</sub>. Bacteria  
 647 were stained with AF488-labelled mouse anti-poly-C9 aE11-antibody (d) and Sytox to  
 648 determine the percentage of cells that has a damaged bacterial IM (e) by flow cytometry. Flow  
 649 cytometry data are represented by geoMFI values or cell frequencies of the bacterial population.  
 650 Data represent mean values +/- SD (a,b,d,e) or individual values (c) of three independent  
 651 experiments with mean +/- SD. Statistical analysis was done on <sup>10</sup>log-transformed data (c) using  
 652 a paired one-way ANOVA with Tukey's multiple comparisons' test. Significance was shown as  
 653 \*  $p \leq 0.05$ , \*\*  $p \leq 0.005$ .

654

655 **Figure 3 – Polymerization of C9 increases OM damage by MAC pores**

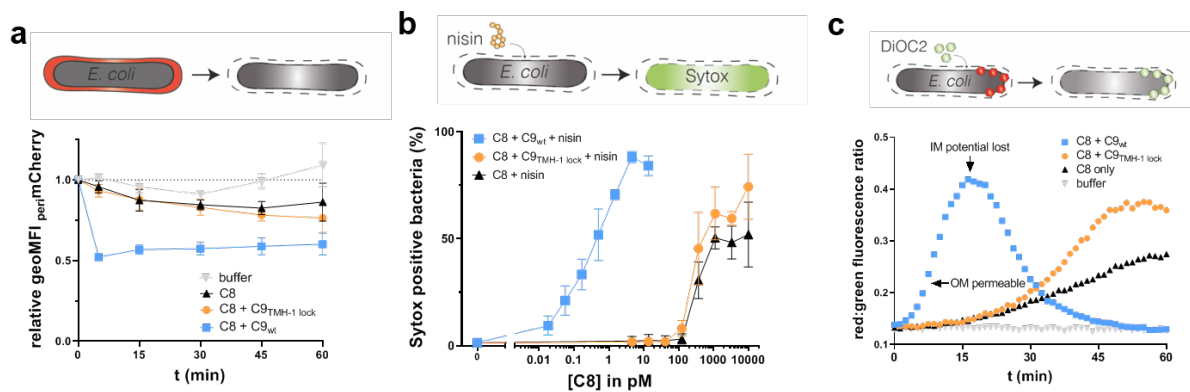

656

657 *E. coli* MG1655 were labelled with C5b-7 by incubating them in 10% C8-depleted serum for  
658 30 minutes. Bacteria were washed and next incubated with buffer, 10 nM C8 with 20 nM C9<sub>wt</sub>  
659 or C9<sub>TMH-1 lock</sub> to measure damage to the bacterial OM. a) periplasmic mCherry (periMCherry,  
660 red) leakage was measured at different time points by flow cytometry and represented as  
661 relative periMCherry fluorescence compared to t=0. b) C5b-7 labelled bacteria were incubated  
662 with a concentration range of C8 and 20 nM C9<sub>wt</sub> or C9<sub>TMH-1 lock</sub> supplemented with 3 µg/ml  
663 nisin for 30 minutes. Nisin influx through OM was measured using Sytox to determine the  
664 percentage of cells that have a damaged bacterial IM as read-out for bacterial killing by flow  
665 cytometry after 30 minutes. c) DiOC<sub>2</sub> enters the cells when the OM is permeable and shifts  
666 from green to red fluorescence in cells with an intact inner membrane (IM) potential. DiOC<sub>2</sub>  
667 shifts back to green fluorescence when the IM potential is lost. Flow cytometry data are  
668 represented by geoMFI values of the bacterial population. Data represent mean +/- SD of three  
669 independent experiments. Multiwell plate-reader assays are shown by one representative  
670 experiment that has been repeated at least three times.

671



672 **Figure 4 – Polymerization of C9 is rate-limiting in the assembly of a complete MAC pore**

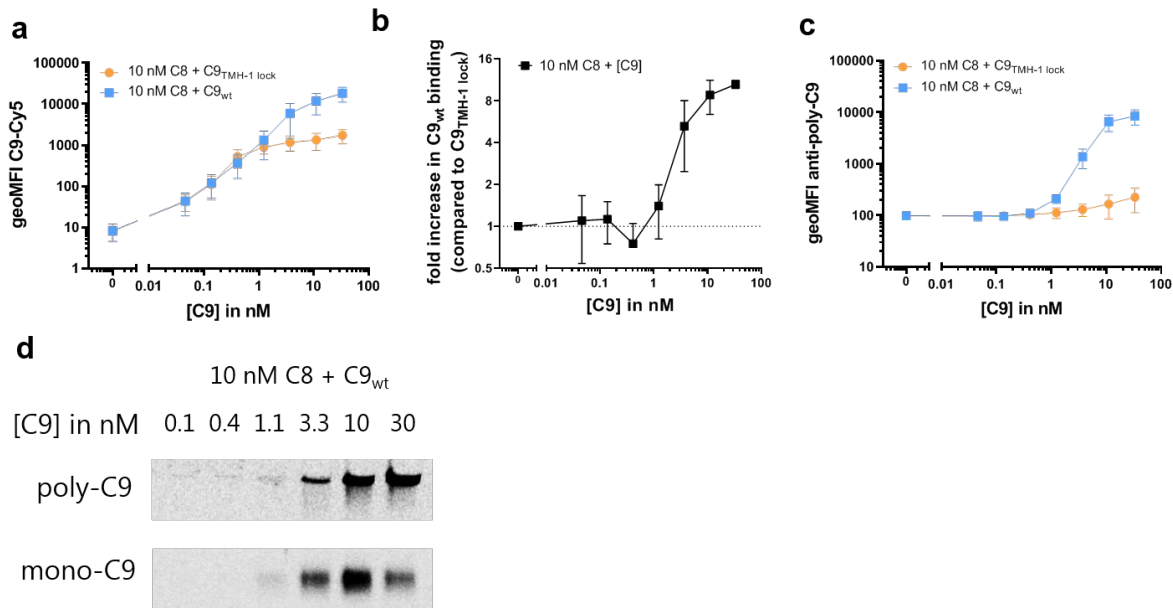

673

674 *E. coli* MG1655 were labelled with C5b-7 by incubating them in 10% C8-depleted serum for  
675 30 minutes. Bacteria were washed and next incubated with 10 nM C8 and a concentration range  
676 of Cy5-labelled C9<sub>wt</sub> or C9<sub>TMH-1 lock</sub> for 30 minutes to measure binding of C9. a) Binding of  
677 Cy5-labelled C9<sub>wt</sub> or C9<sub>TMH-1 lock</sub> to bacteria measured by flow cytometry. b) The relative  
678 increase in C9<sub>wt</sub> binding compared to bacteria labelled with C9<sub>TMH-1 lock</sub> was calculated as  
679 indication for C9 polymerization. c) Bacteria were stained with AF488-labelled mouse anti-  
680 anti-poly-C9 aE11-antibody and staining was measured by flow cytometry. d) Bacterial cell pellets  
681 were analyzed by SDS-PAGE for in-gel fluorescence of Cy5-labelled C9<sub>wt</sub> to distinguish  
682 monomeric-C9 (mono-C9) from polymeric-C9 (poly-C9). Flow cytometry data are represented  
683 by geoMFI values of the bacterial population. Data represent mean +/- SD of three independent  
684 experiments. SDS-PAGE images are representative for at least three independent experiments.

685

686 **Figure 5 – Polymerization of C9 enhances bacterial cell envelope damage and killing in**  
 687 **serum**

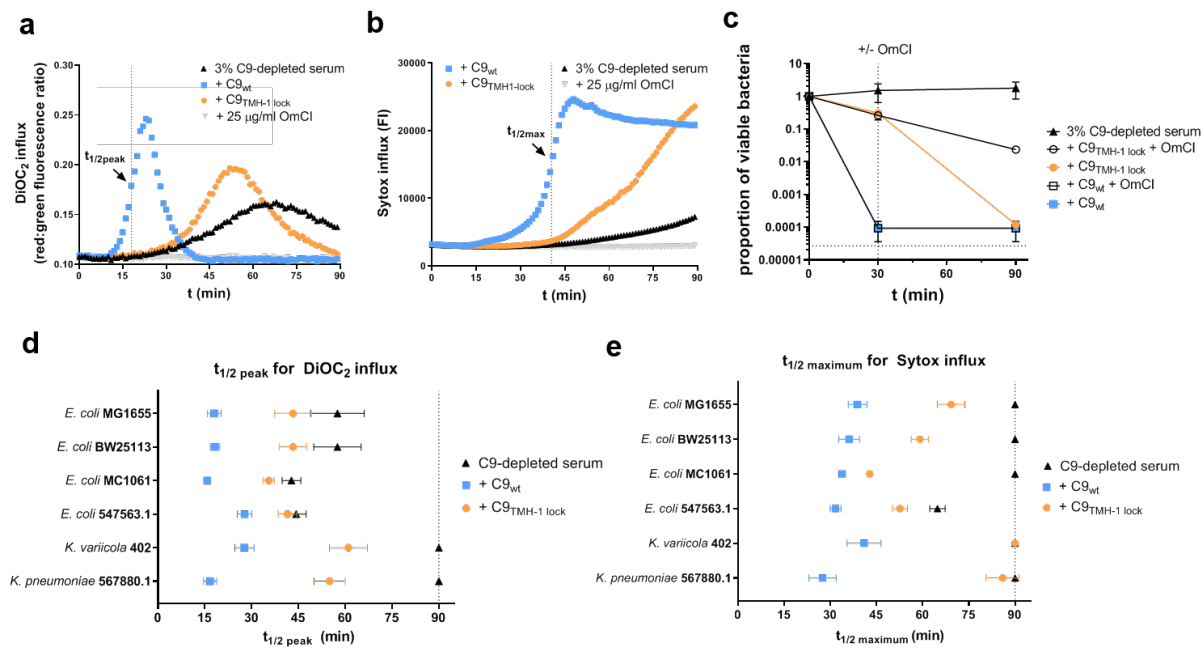

688

689 *E. coli* MG1655 were incubated in 3% C9-depleted serum supplemented with a physiological  
 690 concentration (= 25 nM) of C9<sub>wt</sub> or C9<sub>TMH-1 lock</sub> for 90 minutes. As negative control, 25 µg/ml  
 691 C5 conversion inhibitor OmCI was added to the serum. a) OM damage was measured by DiOC<sub>2</sub>  
 692 influx, which was determined by the shift in red:green fluorescence ratio over time in a  
 693 multiwell plate-reader assay. b) IM damage was measured by Sytox influx over time in a  
 694 multiwell plate-reader assay. c) Bacterial viability was determined at different time points by  
 695 counting colony forming units (CFU's) and calculating the proportion of viable cells compared  
 696 to t=0. At t=30 (vertical dotted line), buffer was added (closed symbols) or OmCI (open  
 697 symbols) to stop MAC formation. The horizontal dotted line represents the detection limit of  
 698 the assay. d-e) Other *E. coli* strains (BW25113, MC1061, 547563.1) and *K. variicola* 402 were  
 699 also incubated in 3% C9-depleted serum supplemented with C9<sub>wt</sub> or C9<sub>TMH-1 lock</sub> for 90 minutes.  
 700 *K. pneumoniae* 567880.1 was incubated in 10% C9-depleted serum because of less efficient  
 701 activation of the complement cascade and was therefore also supplemented with 80 nM C9<sub>wt</sub> or  
 702 C9<sub>TMH-1 lock</sub>. d) OM damage was represented for all strains by the time when DiOC<sub>2</sub> influx  
 703 reached half the value of the peak (t<sub>1/2 peak</sub>, shown in a for C9<sub>wt</sub>). e) IM damage was represented  
 704 for all strains by the time when Sytox fluorescence reached half the maximum value (t<sub>1/2 maximum</sub>,  
 705 shown in b for C9<sub>wt</sub>). Multiwell plate-reader assays (a, b) are shown by one representative  
 706 experiment that has been repeated at least three times. Data represent mean +/- SD of three  
 707 independent experiments (c, d and e).

708 **Figure 6 – Polymerization of C9 is impaired on complement-resistant *E. coli* strains**

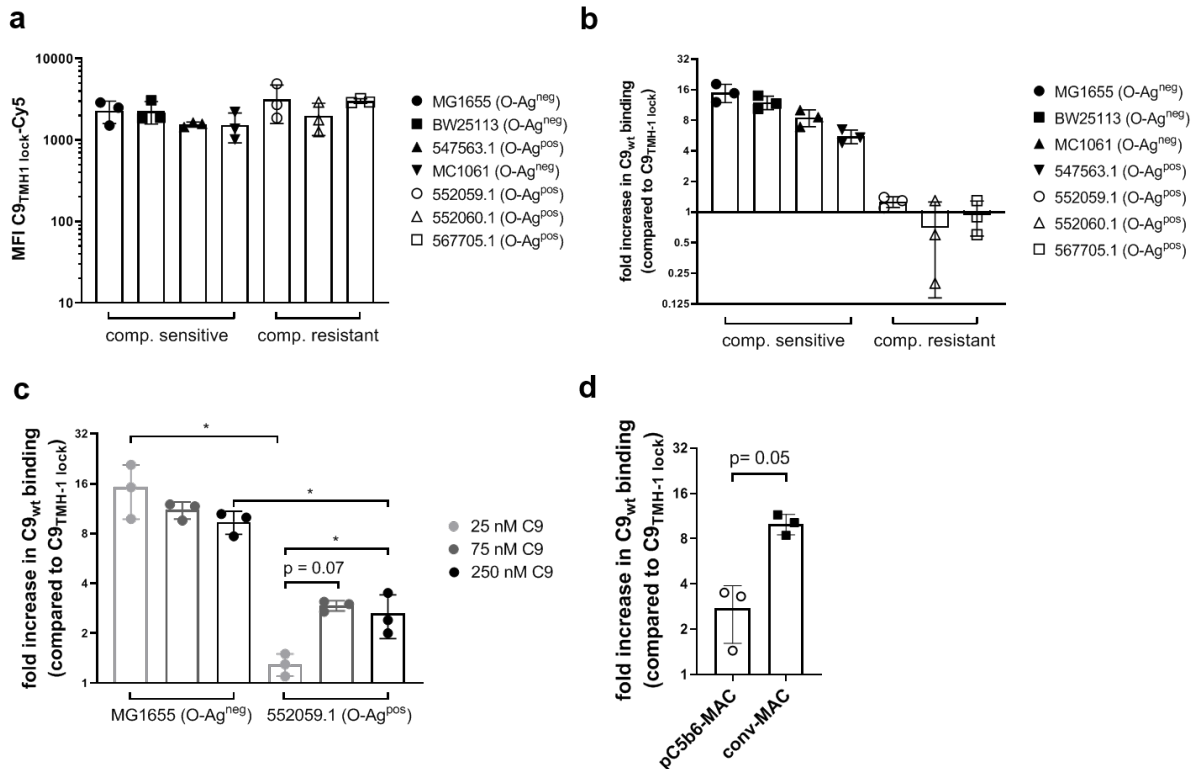

709

710 Complement-resistant (552059.1, 552060.1 and 567705.1) and complement-sensitive  
 711 (MG1655, BW25113, MC1061 and 547563.1) *E. coli* strains were incubated in 3% C9-depleted  
 712 serum supplemented with a physiological concentration (= 25 nM) of Cy5-labelled C9<sub>wt</sub> or  
 713 C9<sup>TMH-1 lock</sup> for 30 minutes to measure C9 binding by flow cytometry. a) Binding of Cy5-  
 714 labelled C9<sup>TMH-1 lock</sup> to bacteria. b) The relative increase in C9<sub>wt</sub> binding compared to bacteria  
 715 labelled with C9<sup>TMH-1 lock</sup> was calculated as indication for C9 polymerization. c) The relative  
 716 increase in C9<sub>wt</sub> binding compared to bacteria labelled with C9<sup>TMH-1 lock</sup> was compared for  
 717 complement-sensitive MG1655 and complement-resistant 552059.1 at different C9  
 718 concentrations. d) MG1655 was labelled with convertases in 10% C5-depleted serum. Next,  
 719 bacteria were washed and 3 nM of preassembled C5b6 (pC5b6) or C5 and C6 (conv-MAC)  
 720 were added, together with excess 20 nM C7, 20 nM C8 and 50 nM Cy5-labelled C9<sub>wt</sub> or C9<sup>TMH-1</sup>  
 721 lock for 30 minutes. The relative increase in C9<sub>wt</sub> binding compared to bacteria labelled with  
 722 C9<sup>TMH-1 lock</sup> was represented. Flow cytometry data are represented by MFI values of the bacterial  
 723 population. Data represent individual values with mean +/- SD of three independent  
 724 experiments. Statistical analysis was done on <sup>2</sup>log-transformed data (a, c, d) using a paired one-  
 725 way ANOVA with Tukey's multiple comparisons' test. Significance was shown as \* p ≤ 0.05.

726

727 **Figure 7 – Assembly of complete MAC pores enhances OM damage and bacterial killing**

728

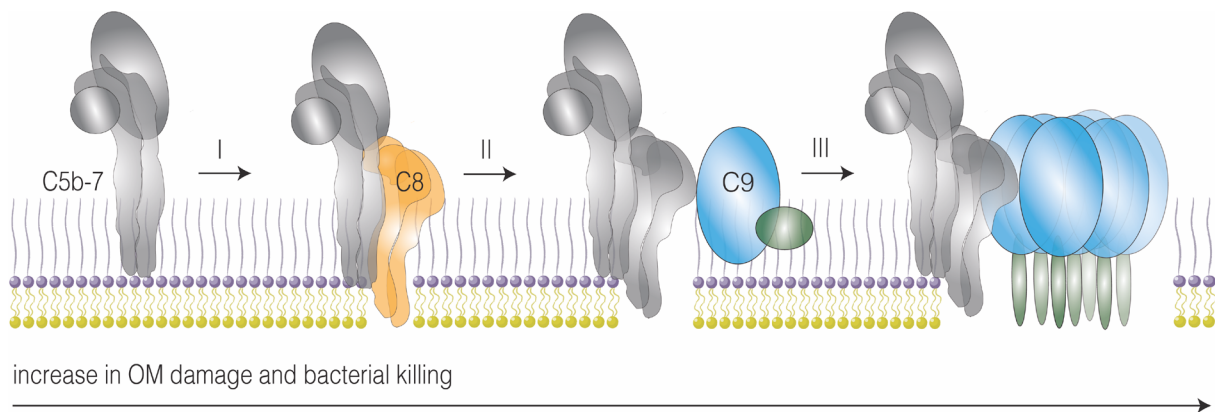

729

730

731 Schematic overview of the assembly of complete MAC pores. I) C8 (orange) binds to  
732 membrane-anchored C5b-7 (grey) and subsequently inserts transmembrane  $\beta$ -hairpins into the  
733 bacterial outer membrane (OM), which causes small lesions in the OM. II) Binding of C9 (blue)  
734 to C5b-8 without polymerization of C9 slightly increases the OM damage and bacterial killing.  
735 III) Polymerization of C9 forms a transmembrane polymeric-C9 ring, which drastically  
736 increases OM damage and rapidly kills bacteria.
